# Supplementary material
Source: PubMed Central journal article supplement (PMC3537310)
Supplement: supp_blood-2012-07-444042_blood-2012-07-444042-1.pdf [file supp_blood-2012-07-444042_blood-2012-07-444042-1.pdf]

## SUPPLEMENTARY METHODS

### *Sequentia LymphoSIGHT™ Method*

Primer Design: First-stage primers were designed to allow for the amplification of all known alleles of the germline *IgH* and TCR sequences. Each *IgH* V<sub>H</sub> segment was amplified by 3 primer sets reducing the chance of somatic mutations interfering with amplification. The numbers of primers and the positions of these primers are shown in Faham and Willis.<sup>1</sup> Similarly, a single primer set was used for each segment of *IgH* DJ<sub>H</sub> and TCR amplification. Common sequences, which were complementary to a set of second stage PCR primers, were appended at the 5' ends of V<sub>H</sub> primers and a J<sub>H</sub> segment primer. The second stage PCR primers contained the common sequence primer and indices for sample multiplexing and cluster formation.

PCR amplification. First stage PCR was carried out using a high-fidelity polymerase (AccuPrime, Life Technologies) for 25 cycles; 1/100 of this amplification reaction was then used as the template for a second PCR reaction, which was carried out for 14 cycles. Multiple samples were pooled and then purified using the QIAquick PCR purification kit (Qiagen). Cluster formation and sequencing reactions were carried out according to the manufacturer protocol (Illumina, La Jolla, CA). Three sequencing reactions were performed: (1) 115 bp from the J<sub>H</sub> side through the junctional sequence from J<sub>H</sub> to V<sub>H</sub>; (2) Sample index for 9 cycles to identify the sample with the sample index; and (3) 95 bp from the V<sub>H</sub>- to-J<sub>H</sub> direction providing ample sequence to map the V<sub>H</sub> segment accurately.

Clonotype determination. Algorithmic methods were utilized for clonotype determination. Low quality reads, defined as those that do not map to a J and a V segment and do not demonstrate

high-quality sequence data in the clone-defining region, were excluded. Sequence data were analyzed to determine the clonotype sequences including mapping to germline V and J consensus sequences. First, the forward sequence read was used to map the J segment. After J segment identification, V segments were mapped using the reverse sequence read. The V<sub>H</sub> primer was mapped and the bases under this primer were excluded from further analysis of the reverse read. Thereafter, the next ~70 bases of the reverse read were mapped to the known V<sub>H</sub> segments. Read pairs that did not map to V segments were excluded. The next step in mapping involved identifying the frame that related the forward and reverse reads and this allowed a continuous sequence from J to V to be constructed.

To generate a clonotype, identification of at least two identical sequences was required. We developed an algorithm to determine whether similar sequencing reads are the result of biological differences in the initial sample or technical artifact (i.e., sequencing or PCR error). The algorithm takes into account the number of sequencing reads and the degree of sequence variation between the clonotypes in question. For example, assume that 2 clonotypes are found in the same sample, which have a 2 base difference from each other. If 100 reads are obtained for clone 1 and 70 reads for clone 2, these clonotypes are not likely to be the result of a technical artifact. Alternatively, assume that 2 clonotypes are found in the same sample, which differ by 1 base. If 300 reads are obtained from clone 1 and 2 reads from clone 2, these clonotypes are likely to be the result of sequencing or PCR error.

## **REFERENCES CITED**

1. Faham M, Willis T. Monitoring health and disease status using clonotype profiles. U.S. Patent Application No. 2011/0207134A1, August 25, 2011.

## SUPPLEMENTARY TABLES

**Supplementary Table 1.** Technical performance data: relative standard deviation for dilution replicates.

| <b>Frequency</b> | <b>Average RSD Replicates (%)</b> |
|------------------|-----------------------------------|
| 1.00E-06         | 49                                |
| 3.00E-06         | 20                                |
| 1.00E-05         | 16                                |
| 3.00E-05         | 6.9                               |
| 1.00E-04         | 4.1                               |
| 3.00E-04         | 7.6                               |
| 1.00E-03         | 5.5                               |

**Supplementary Table 2.** Technical performance data:  $r^2$  and slope for dilution replicates.<sup>a</sup>

| <b>Clone</b> | <b><math>r^2</math></b> | <b>Slope</b> |
|--------------|-------------------------|--------------|
| 1            | 0.981                   | 1.14         |
| 2            | 0.985                   | 0.878        |
| 3            | 0.994                   | 0.907        |
| 4            | 0.992                   | 1.08         |
| 5            | 0.992                   | 1.08         |
| 6            | 0.977                   | 0.977        |
| 7            | 0.989                   | 1.08         |
| 8            | 0.991                   | 0.925        |
| 9            | 0.996                   | 0.935        |
| 10           | 0.993                   | 0.968        |
| 11           | 0.98                    | 1            |
| 12           | 0.993                   | 0.939        |
| 13           | 0.989                   | 1.12         |

<sup>a</sup>Lines were fit for the relationship between expected and observed level (after conversion to log) of the diluted clonotypes. Shown are the  $r^2$  and the slope for each of the clones.

**Supplementary Table 3.** MRD results for sequencing, flow cytometry and ASO-PCR methods in 106 ALL samples.

| Patient ID | Time of Collection | Input Cells | % MRD      |                |              |
|------------|--------------------|-------------|------------|----------------|--------------|
|            |                    |             | Sequencing | Flow Cytometry | Standard PCR |
| 1          | day 19             | 396291      | 0.0028     | 0.0110         | 0.0130       |
| 2          | wk 7               | 181863      | UD         | UD             | UD           |
| 3          | day 26             | 227287      | 0.3473     | 1.7530         | 1.1000       |
| 4          | day 46             | 245156      | UD         | UD             | UD           |
| 5          | wk 7               | 375583      | 0.0186     | 0.0450         | 0.0360       |
| 6          | day 46             | 229625      | UD         | UD             | UD           |
| 7          | day 19             | 377086      | 0.0342     | 0.0630         | 0.2300       |
| 8          | wk 7               | 229458      | UD         | UD             | UD           |
| 9          | day 46             | 248496      | 0.00004    | UD             | UD           |
| 10         | day 46             | 272210      | 0.0841     | 0.1330         | 0.2200       |
| 11         | day 46             | 190345      | 1.9667     | 1.8700         | 0.0160       |
| 12         | day 46             | 133669      | 0.0027     | UD             | 0.0017       |
| 14         | day 19             | 141266      | 0.0362     | 0.0120         | 0.0110       |
| 15         | day 19             | 127499      | 1.8536     | 0.6580         | 1.1000       |
| 16         | wk 7               | 914645      | UD         | UD             | UD           |
| 17         | day 46             | 171789      | 0.0041     | 0.0080         | 0.0029       |
| 18         | day 46             | 927850      | UD         | UD             | UD           |
| 19         | wk 7               | 737057      | UD         | UD             | UD           |
| 20         | day 19             | 117546      | 0.3635     | 0.2350         | 0.0760       |
| 21         | day 46             | 138268      | 0.0134     | 0.0030         | 0.0022       |
| 22         | day 19             | 86143       | 0.2799     | 0.0450         | 0.0690       |
| 23         | day 46             | 938554      | UD         | UD             | UD           |

|    |        |         |        |        |        |
|----|--------|---------|--------|--------|--------|
| 25 | day 46 | 142310  | 0.0106 | UD     | 0.0005 |
| 26 | wk 120 | 893286  | UD     | UD     | UD     |
| 27 | day 46 | 126252  | 0.0569 | 0.0100 | 0.0150 |
| 28 | wk 17  | 836207  | UD     | UD     | UD     |
| 29 | day 19 | 161142  | 0.9607 | UD     | 1.2000 |
| 30 | day 19 | 120307  | 0.0032 | UD     | 0.0076 |
| 31 | day 46 | 1109253 | 0.0014 | UD     | UD     |
| 32 | wk 120 | 726829  | UD     | UD     | UD     |
| 33 | wk 17  | 902662  | UD     | UD     | UD     |
| 34 | day 19 | 1043573 | UD     | UD     | UD     |
| 35 | day 46 | 1763995 | UD     | UD     | UD     |
| 36 | wk 7   | 1070242 | UD     | UD     | 0.0020 |
| 37 | wk 146 | 1405104 | UD     | UD     | UD     |
| 38 | wk 120 | 210397  | UD     | UD     | UD     |
| 39 | day 46 | 280097  | 0.0362 | 0.0200 | 0.0360 |
| 40 | wk 120 | 564621  | UD     | UD     | UD     |
| 41 | day 46 | 626380  | 0.0005 | UD     | 0.0051 |
| 42 | wk 120 | 1125658 | UD     | UD     | UD     |
| 43 | day 46 | 1227371 | UD     | UD     | UD     |
| 44 | wk 48  | 1556654 | UD     | UD     | UD     |
| 45 | wk 48  | 1398000 | UD     | UD     | UD     |
| 46 | wk 17  | 206141  | UD     | UD     | UD     |
| 47 | day 19 | 144025  | 0.0320 | 0.0860 | 0.0240 |
| 48 | day 46 | 273636  | UD     | UD     | UD     |
| 49 | wk 17  | 1357339 | UD     | UD     | UD     |
| 50 | day 46 | 248321  | 0.5495 | 0.4290 | 0.1600 |
| 51 | wk 17  | 201563  | UD     | UD     | UD     |

|    |        |         |        |        |        |
|----|--------|---------|--------|--------|--------|
| 52 | wk 7   | 222551  | 0.0988 | 0.0570 | 0.0670 |
| 53 | wk 48  | 654390  | UD     | UD     | UD     |
| 54 | wk 120 | 565318  | UD     | UD     | UD     |
| 55 | wk 120 | 990287  | UD     | UD     | UD     |
| 56 | day 19 | 191148  | 0.6396 | 0.4780 | 0.3500 |
| 57 | day 46 | 197881  | 0.0832 | 0.0700 | 0.0370 |
| 58 | day 19 | 171326  | 0.0102 | UD     | 0.0120 |
| 59 | wk 48  | 1252982 | UD     | UD     | UD     |
| 60 | wk 7   | 619176  | UD     | UD     | UD     |
| 61 | wk 48  | 893485  | UD     | UD     | UD     |
| 62 | day 46 | 132038  | 0.3035 | 0.0560 | 0.0940 |
| 63 | wk 7   | 830152  | UD     | UD     | UD     |
| 64 | wk 48  | 848615  | UD     | UD     | UD     |
| 66 | wk 48  | 1206717 | UD     | UD     | UD     |
| 67 | day 46 | 118115  | 0.0339 | 0.0070 | 0.0040 |
| 68 | day 46 | 146424  | 0.0241 | 0.0270 | 0.0180 |
| 69 | day 46 | 113497  | 0.0385 | 0.0300 | 0.0310 |
| 70 | wk 48  | 791378  | UD     | UD     | UD     |
| 71 | wk 120 | 838569  | UD     | UD     | UD     |
| 72 | wk 7   | 1211859 | UD     | UD     | UD     |
| 73 | day 46 | 983289  | 0.0004 | UD     | UD     |
| 74 | wk 146 | 869338  | UD     | UD     | UD     |
| 75 | wk 48  | 1358960 | UD     | UD     | UD     |
| 76 | day 19 | 153787  | 0.0312 | 0.0340 | 0.0100 |
| 77 | wk 120 | 826209  | UD     | UD     | UD     |
| 78 | wk 17  | 778707  | UD     | UD     | UD     |
| 79 | day 46 | 716734  | UD     | UD     | UD     |



|     |        |         |         |          |         |
|-----|--------|---------|---------|----------|---------|
| 80  | wk 120 | 982602  | UD      | UD       | UD      |
| 81  | wk 7   | 1291093 | UD      | UD       | UD      |
| 82  | wk 7   | 714626  | UD      | UD       | UD      |
| 83  | wk 146 | 806382  | UD      | UD       | UD      |
| 84  | wk 7   | 779402  | UD      | UD       | UD      |
| 85  | wk 17  | 772165  | UD      | UD       | UD      |
| 86  | wk 17  | 624304  | UD      | No assay | UD      |
| 87  | wk 7   | 841964  | UD      | UD       | UD      |
| 88  | day 26 | 115013  | 32.2783 | 30.1400  | 17.0000 |
| 89  | wk 7   | 1092445 | UD      | UD       | UD      |
| 90  | day 26 | 125822  | 0.5258  | 0.5330   | 0.1600  |
| 91  | wk 17  | 736134  | UD      | UD       | UD      |
| 92  | wk 7   | 878092  | UD      | UD       | UD      |
| 93  | wk 120 | 746149  | UD      | UD       | UD      |
| 94  | day 19 | 122267  | 20.1995 | 18.6000  | 14.0000 |
| 95  | wk 120 | 665950  | UD      | UD       | UD      |
| 96  | wk 48  | 624069  | UD      | UD       | UD      |
| 97  | wk 17  | 150808  | UD      | UD       | UD      |
| 98  | day 46 | 162217  | 0.0097  | UD       | 0.0038  |
| 99  | wk 17  | 754359  | UD      | UD       | UD      |
| 101 | day 19 | 134193  | 0.0377  | 0.0250   | 0.0190  |
| 102 | wk 48  | 706041  | UD      | UD       | UD      |
| 103 | wk 17  | 864971  | UD      | UD       | UD      |
| 104 | wk 7   | 1005772 | UD      | UD       | UD      |
| 105 | wk 48  | 936670  | UD      | UD       | UD      |
| 106 | wk 7   | 695583  | UD      | UD       | UD      |
| 107 | wk 120 | 721544  | UD      | UD       | UD      |

|     |        |         |    |    |    |
|-----|--------|---------|----|----|----|
| 108 | wk 120 | 773343  | UD | UD | UD |
| 109 | wk 7   | 1157994 | UD | UD | UD |
| 110 | wk 7   | 1250016 | UD | UD | UD |

UD = Undetectable

**Supplementary Table 4.** MRD results for *IgH* and second receptor using sequencing method in 9 ALL samples.

| <b>Patient ID</b> | <b>Time of collection</b> | <b>Input cells</b> | <b>% MRD (<i>IgH</i>)</b> | <b>Receptor 2</b> | <b>% MRD (Receptor 2)</b> |
|-------------------|---------------------------|--------------------|---------------------------|-------------------|---------------------------|
| 22                | day 19                    | 86143              | 0.2799                    | TRD@              | 0.0109                    |
| 26                | wk 120                    | 893286             | UD                        | TRD@              | UD                        |
| 29                | day 19                    | 161142             | 0.9607                    | TRG@              | 0.3221                    |
| 66                | wk 48                     | 1206717            | UD                        | TRG@              | UD                        |
| 71                | wk 120                    | 838569             | UD                        | TRD@              | UD                        |
| 81                | wk 7                      | 1291093            | UD                        | TRG@              | UD                        |
| 91                | wk 17                     | 736134             | UD                        | TRG@              | UD                        |
| 99                | wk 17                     | 754359             | UD                        | TRG@              | UD                        |
| 107               | wk 120                    | 721544             | UD                        | TRD@              | UD                        |

UD = Undetectable
